# Supplementary material for: Recent advances and applications of capillary electrophoresis-sodium dodecyl sulfate for characterization and fragment identification of monoclonal antibodies and their derivatives
Source: Royal Society of Chemistry journal article supplement (doi:10.1039/d5an00918a), 2025-12-19
Supplement: d5an00918a1.pdf [file d5an00918a1.pdf]

Table S1 Raw data of migration time for antibody derivatives by NRCE-SDS.

| Antibody Derivatives      | Peaks  | Migration time(min) |
|---------------------------|--------|---------------------|
| Polatuzumab Vedotin       | Peak 1 | 16.525              |
|                           | Peak 2 | 20.600              |
|                           | Peak 3 | 23.058              |
|                           | Peak4  | 25.600              |
|                           | Peak 5 | 27.167              |
|                           | Peak 6 | 29.175              |
| Sacituzumab Govitecan     | Peak 1 | 23.167              |
|                           | Peak 2 | 29.092              |
| Mirvetuximab Soravtansine | Peak 1 | 37.413              |
|                           | Peak 2 | 38.271              |

This table presents the raw migration times of clearly separated peaks in NRCE-SDS profiles, ranked by increasing migration time.

Table S2 Raw data of migration time for antibody derivatives by RCE-SDS.

| Antibody Derivatives   | Peaks  | Migration time(min) |
|------------------------|--------|---------------------|
| Loncastuximab Tesirine | Peak 1 | 15.650              |
|                        | Peak 2 | 15.850              |
|                        | Peak 3 | 19.742              |
| Zanidatamab            | Peak 1 | 16.525              |
|                        | Peak 2 | 20.617              |
|                        | Peak 3 | 21.017              |
| Glofitamab             | Peak 1 | 17.117              |
|                        | Peak 2 | 17.300              |
|                        | Peak 3 | 21.433              |
|                        | Peak 4 | 23.667              |

This table presents the raw migration times of clearly separated peaks in RCE-SDS profiles, ranked by increasing migration time.
